# Supplementary material for: Modified Linear Peptides Effectively Silence STAT-3 in Breast Cancer and Ovarian Cancer Cell Lines
Source: MDPI journal article supplement (doi:10.3390/pharmaceutics15020666), 2023-02-16
Supplement: s1 [file s1]

## Supporting Information

# Modified Linear Peptides Effectively Silence STAT-3 in Breast Cancer and Ovarian Cancer Cell lines

Dindyal Mandal <sup>1,2</sup>, Sandeep Lohan <sup>1</sup>, Muhammad Imran Sajid <sup>1,3</sup>, Abdulelah Alhazza <sup>1,4</sup>, Rakesh Kumar Tiwari <sup>1,\*</sup>, Keykavous Parang <sup>1,\*</sup> and Hamidreza Montazeri Aliabadi <sup>1,\*</sup>

<sup>1</sup> Center for Targeted Drug Delivery, Department of Biomedical and Pharmaceutical Sciences, Chapman University School of Pharmacy, Harry and Diane Rinker Health Science Campus, Irvine, CA 92618, USA; dmandal@kiitbiotech.ac.in (D.M.); lohan@chapman.edu (S.L.); msajid@chapman.edu (M.I.S.); alhazza@chapman.edu (A.A.)

<sup>2</sup> School of Biotechnology, KIIT Deemed to Be University, Bhubaneswar 751024, India

<sup>3</sup> Faculty of Pharmacy, University of Central Punjab, Lahore 54000, Pakistan

<sup>4</sup> Department of Pharmaceutics, Faculty of Pharmacy, Northern Border University, Rafha 76313, Saudi Arabia

\* Correspondence: tiwari@chapman.edu (R.K.T.); parang@chapman.edu (K.P.); montazer@chapman.edu (H.M.A.); Tel.: +1-(714)-516-5483 (R.K.T.); +1-714-516-5489 (K.P.); +1-714-516-5492 (H.M.A.); Fax: +1-(714)-516-5481 (R.K.T.) & (K.P.) & (H.M.A.)

## Supplementary Figure S1. Mass Spectra of Synthesized Peptides.

### A. MLP1

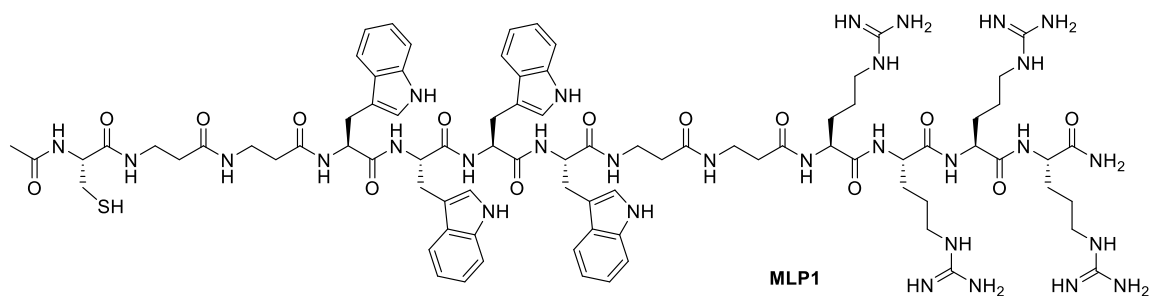

Chemical Formula:  $C_{85}H_{118}N_{30}O_{14}S$   
Exact Mass: 1814.9164

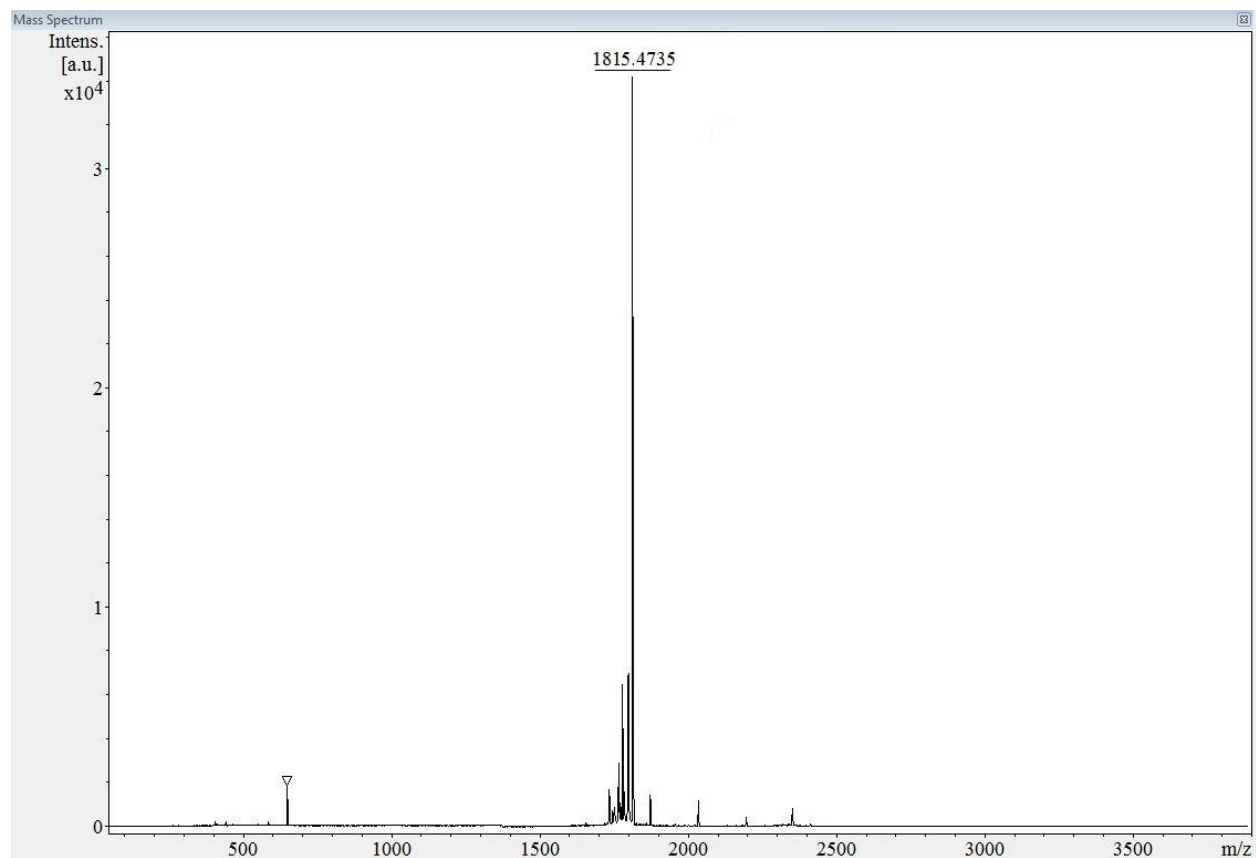

## B. MLP2

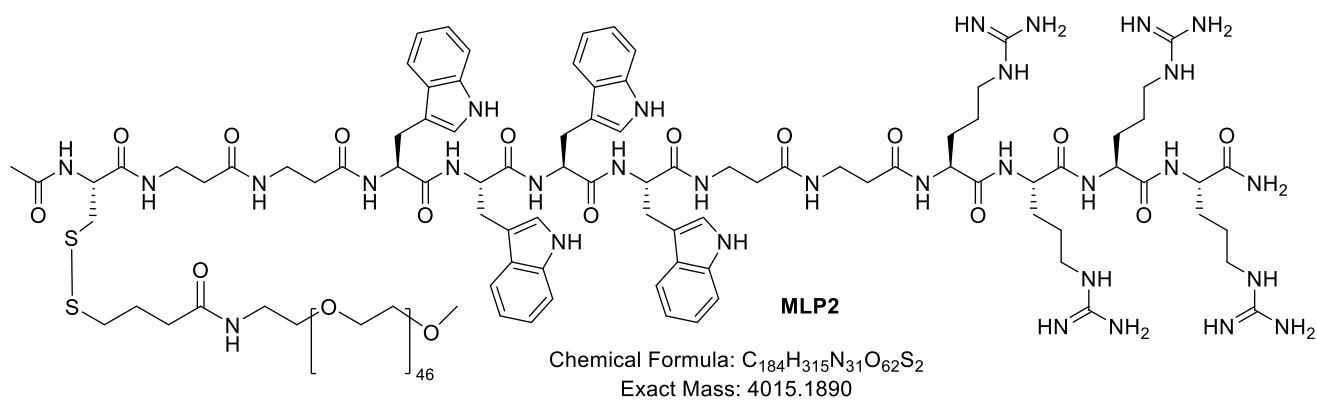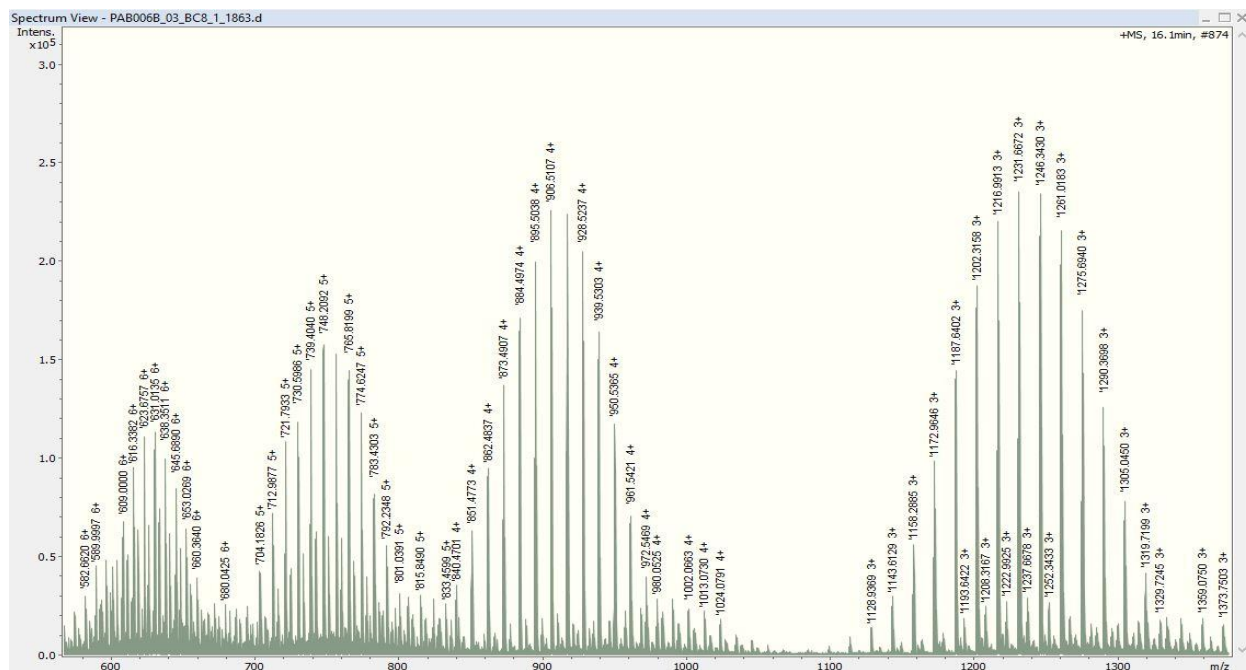

### C. MLP 3

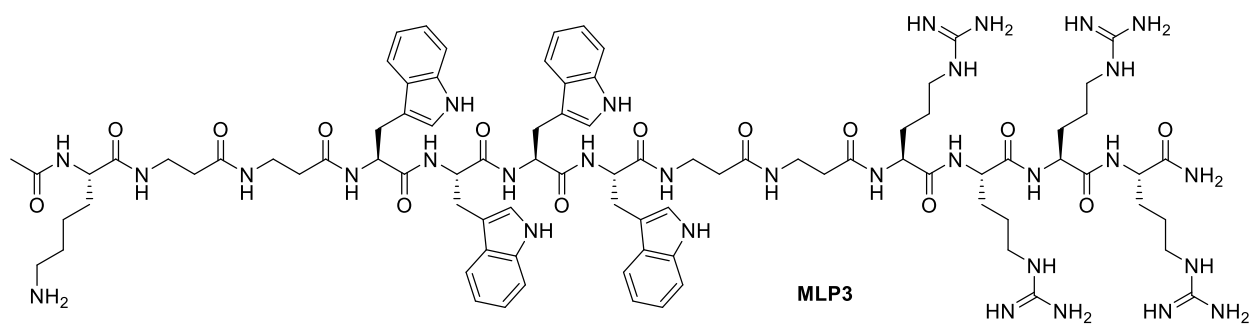

Chemical Formula:  $C_{88}H_{125}N_{31}O_{14}$   
Exact Mass: 1840.0022

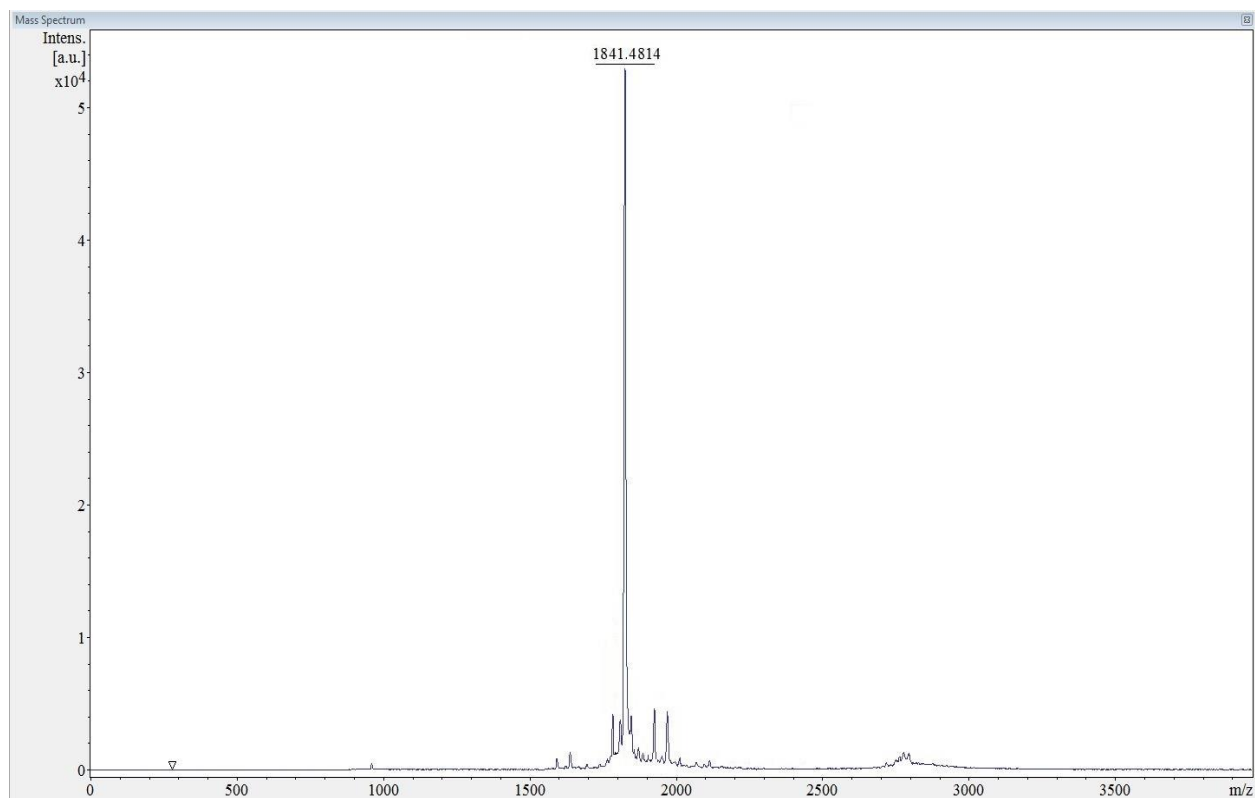

## D. MLP4

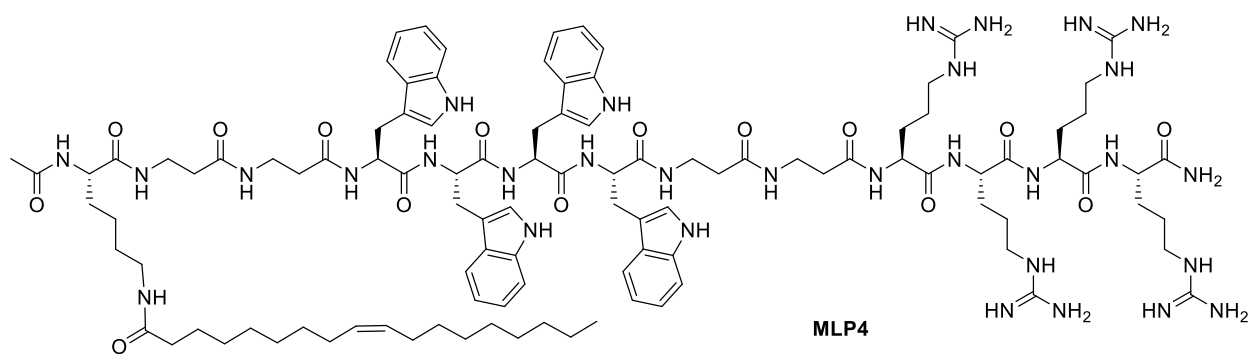

Chemical Formula:  $C_{106}H_{157}N_{31}O_{15}$   
Exact Mass: 2104.2475

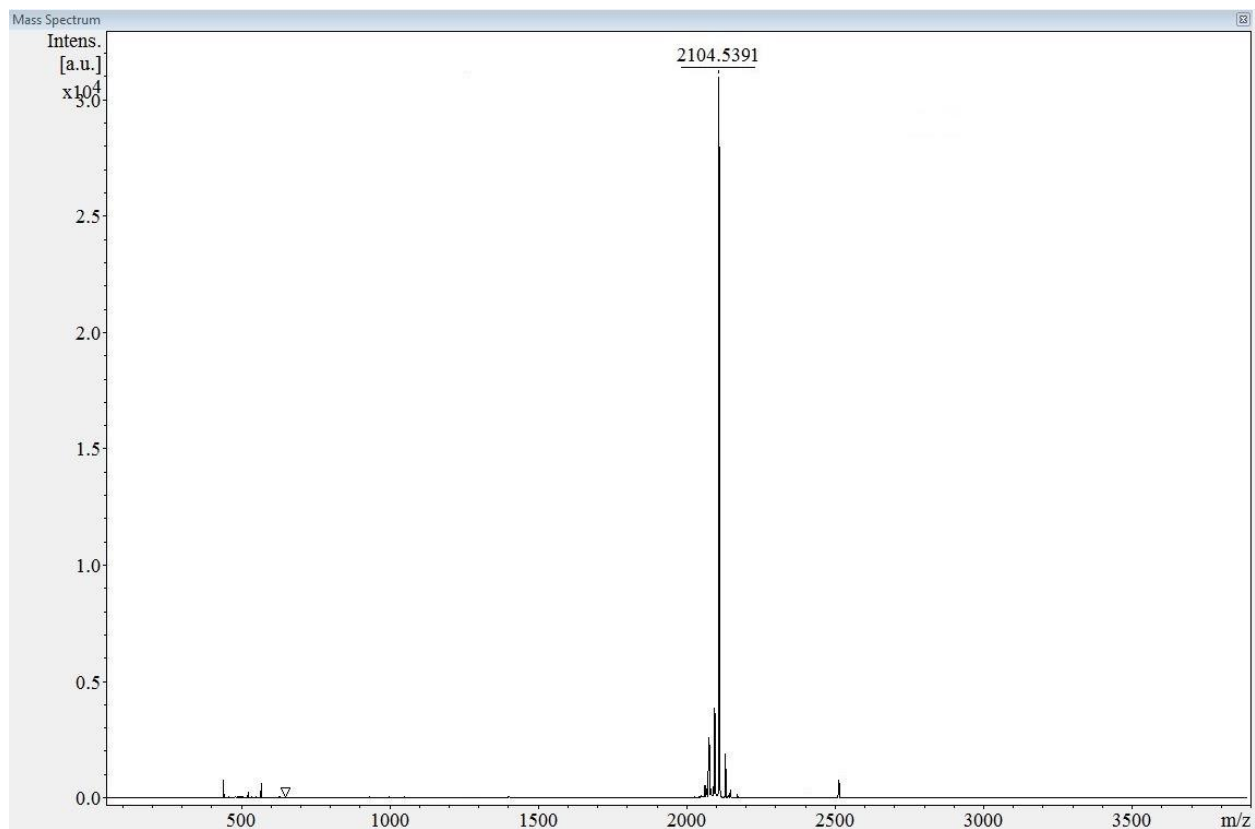

## E. MLP5

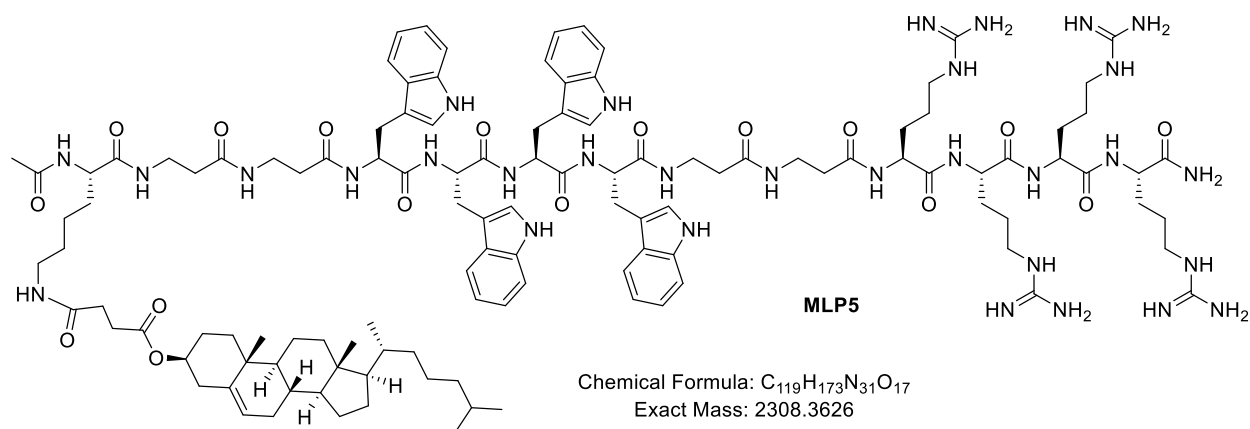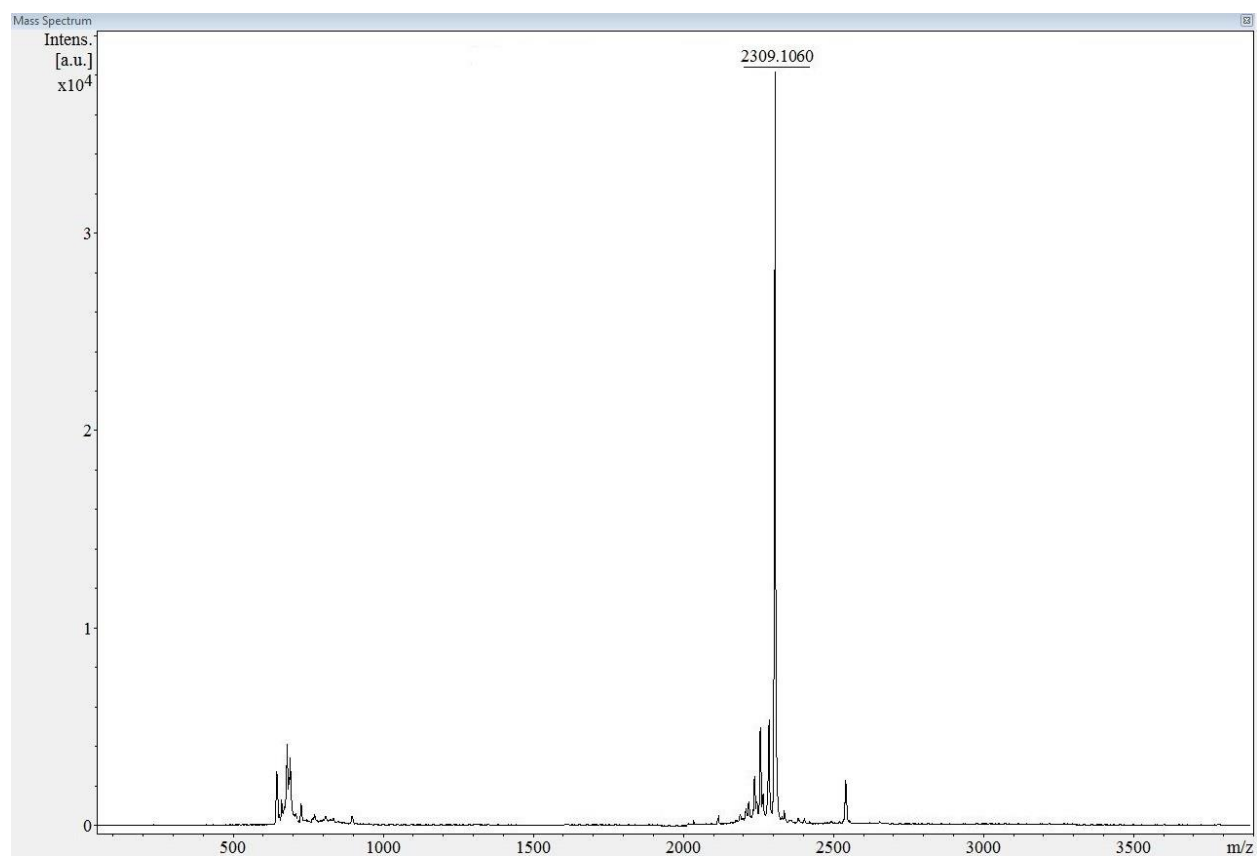

## F. MLP6

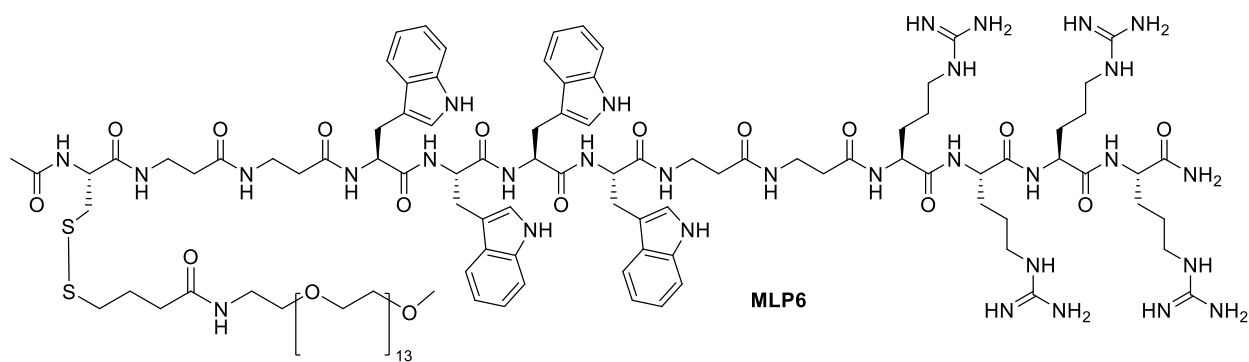

Chemical Formula:  $C_{118}H_{183}N_{31}O_{29}S_2$   
Exact Mass: 2562.3239

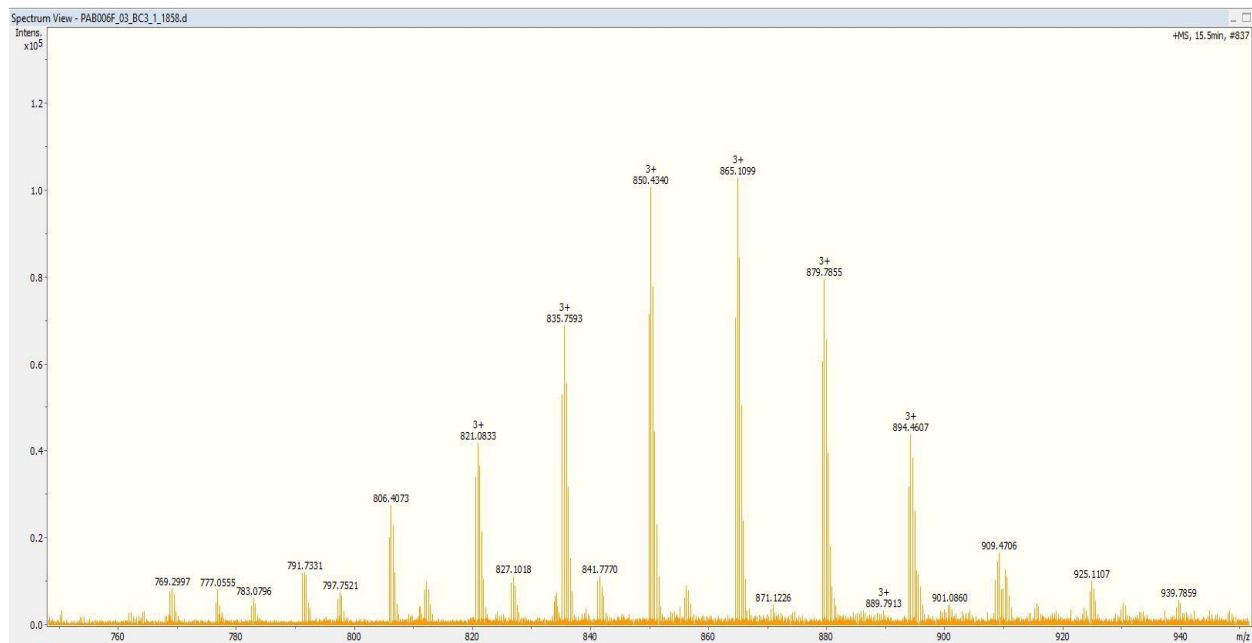

## Supplementary Figure S2. HPLC data for non-PEGylated Synthesized Peptides.

### MLP-1

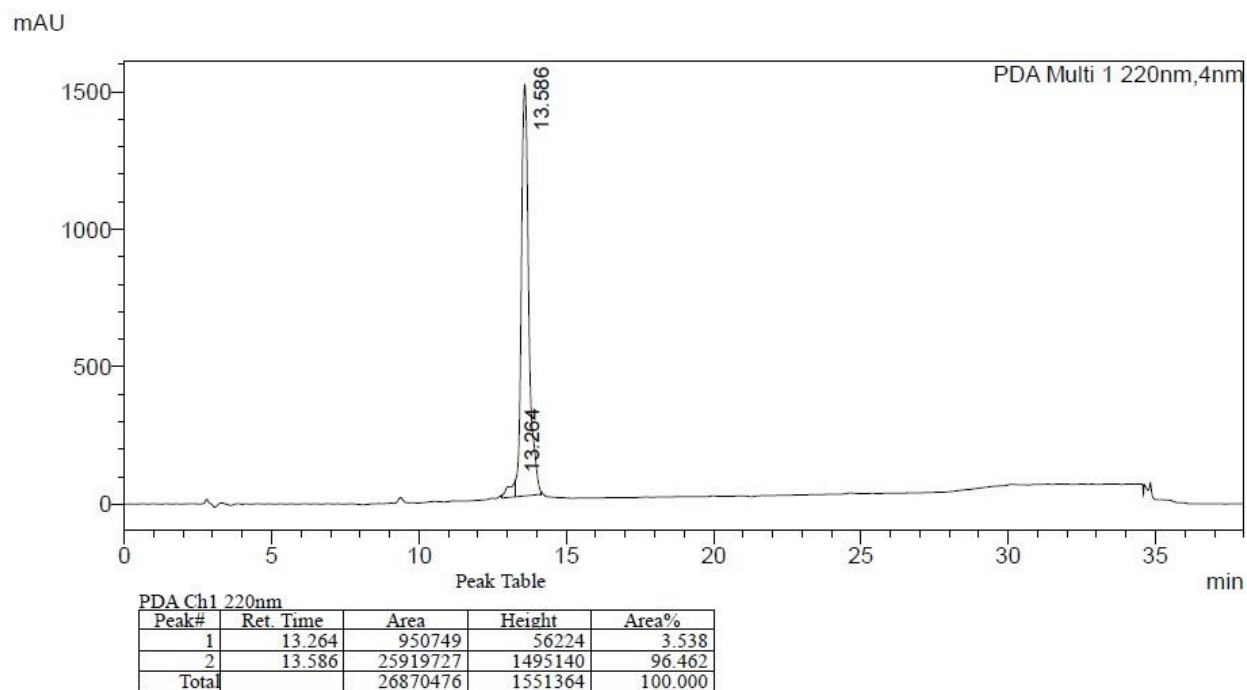

### MLP-3

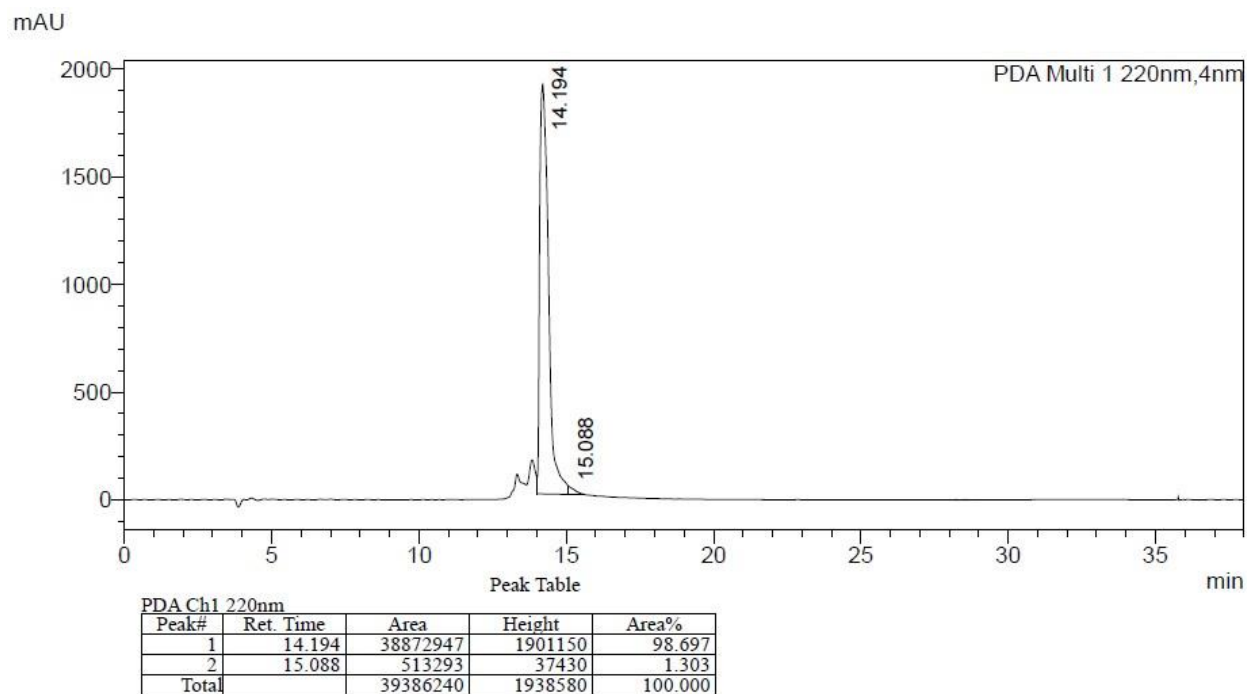

## MLP-4

mAU

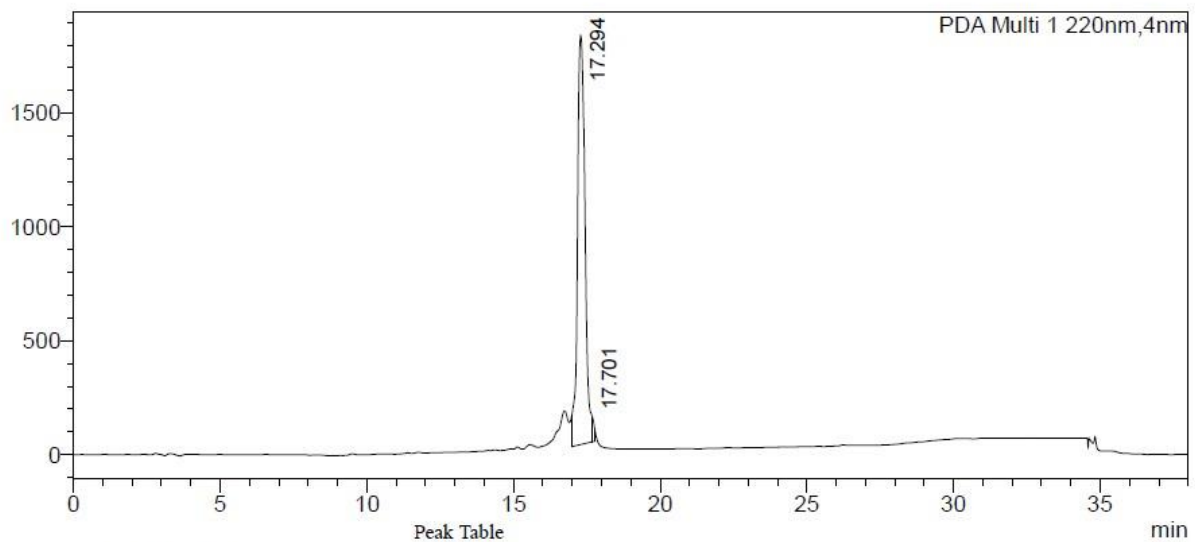

## MLP-5

mAU

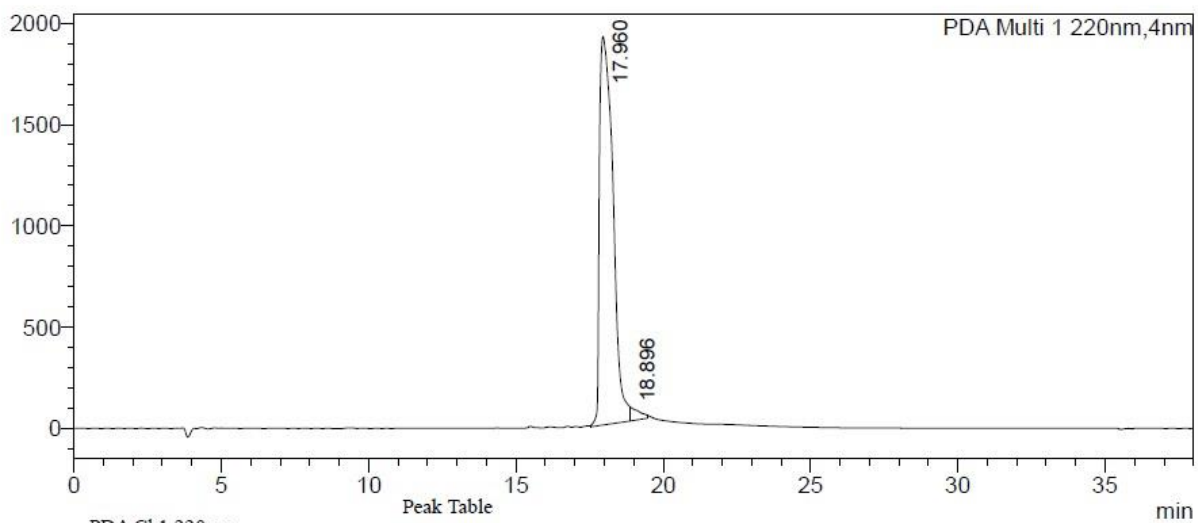

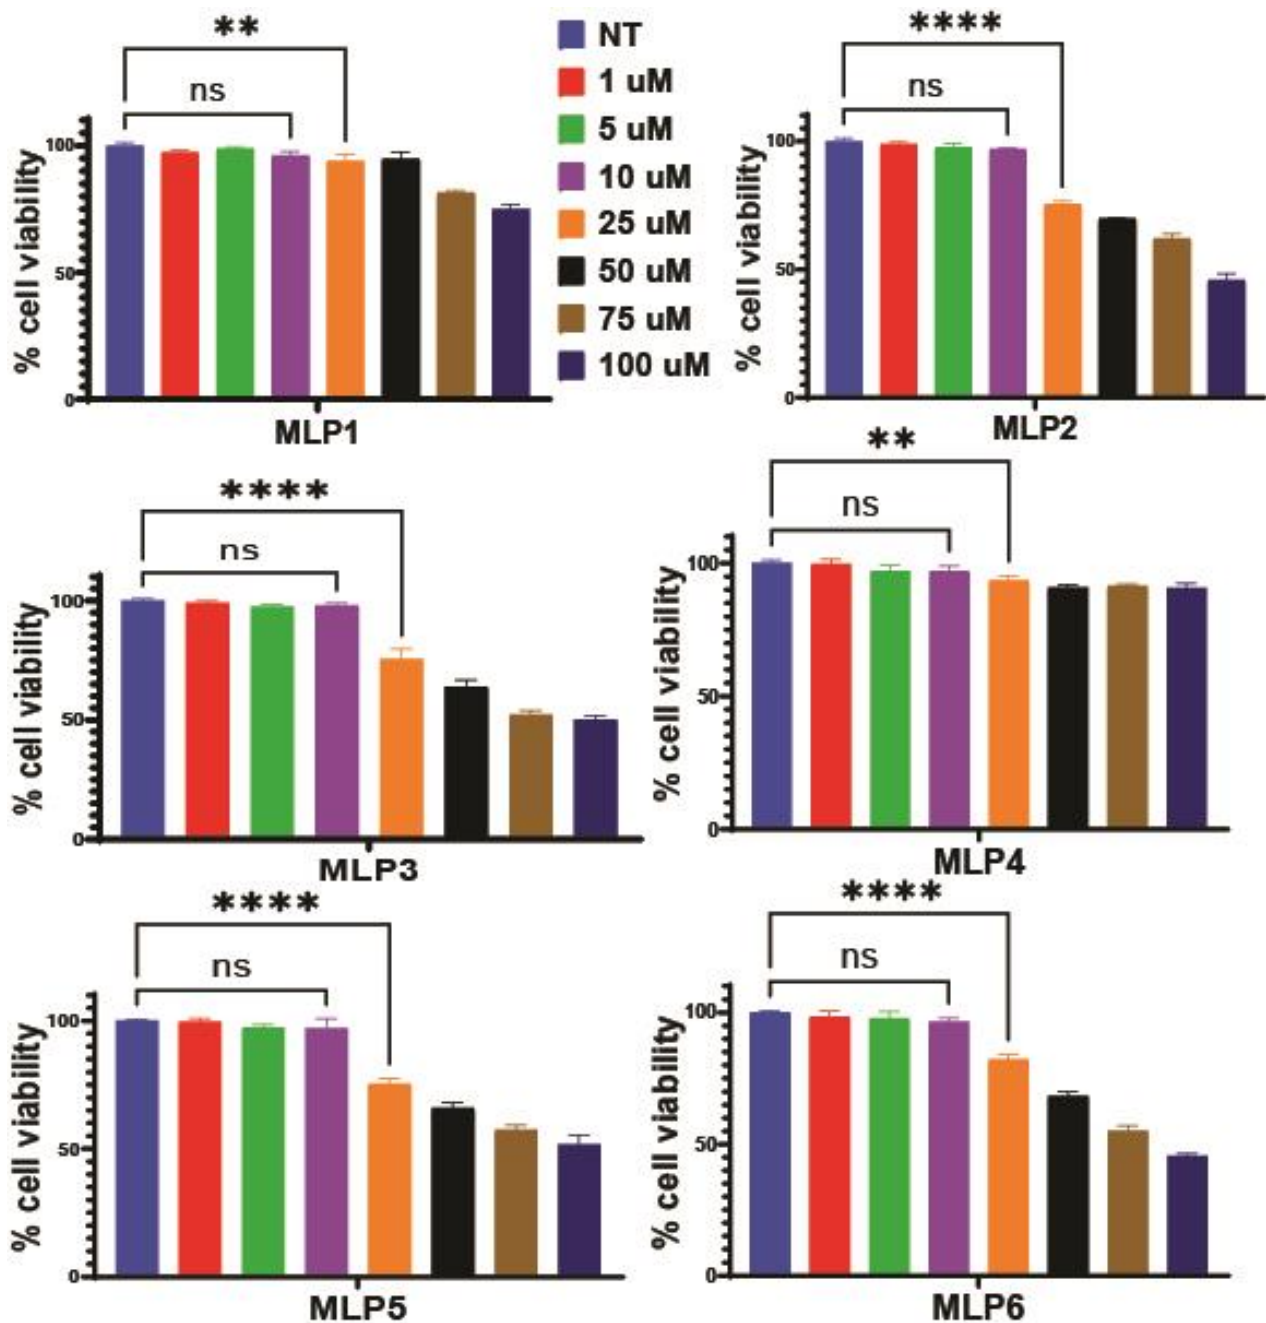

**Supplementary Figure S3.** Cytotoxicity of peptides in MDA-MB-231 cells at different concentrations (incubation time: 48 h; Graphs represent mean normalized values (based on No Treatment or NT group;  $n = 3$ ). Error bars indicate standard deviation. ns means non-significant ( $p$ -value  $> 0.05$ , \*\* means  $p$ -value  $< 0.001$ , and \*\*\*\* means  $p$ -value  $< 0.0001$ )

Supplementary Figure S4. The complete (unedited) Western blot images provided in the manuscript.

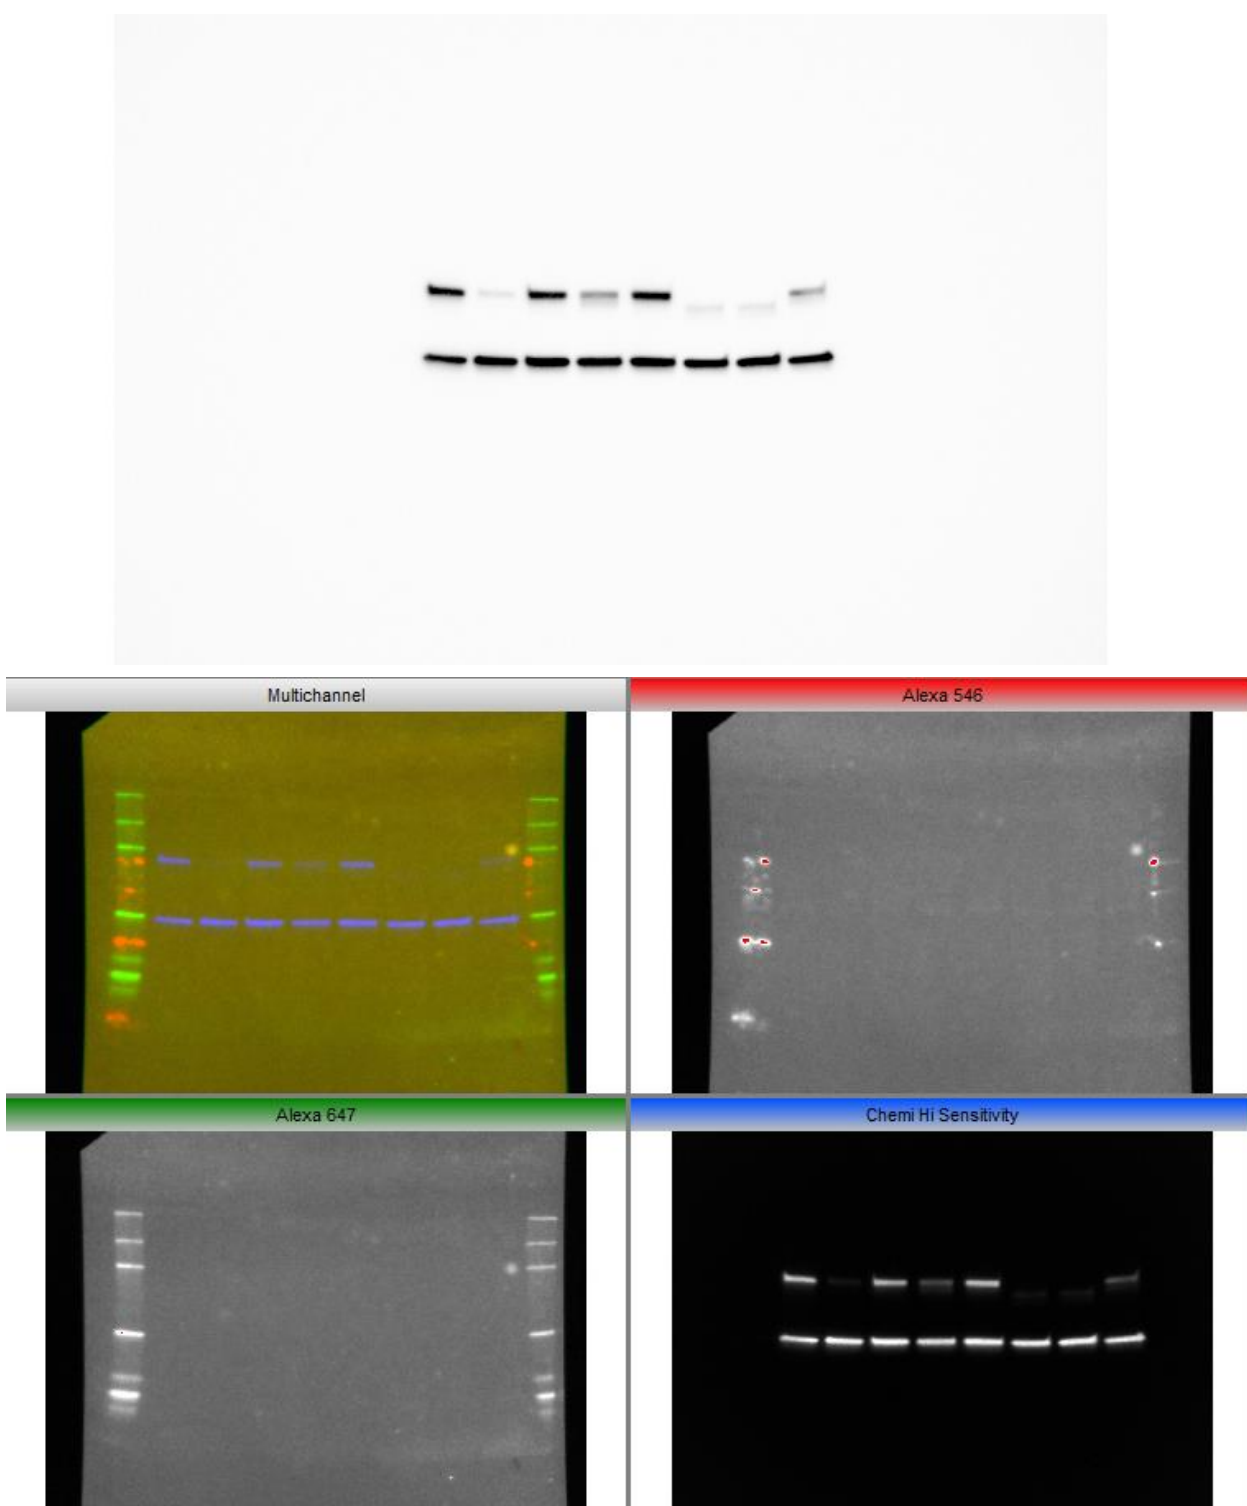

A) Figure 10A

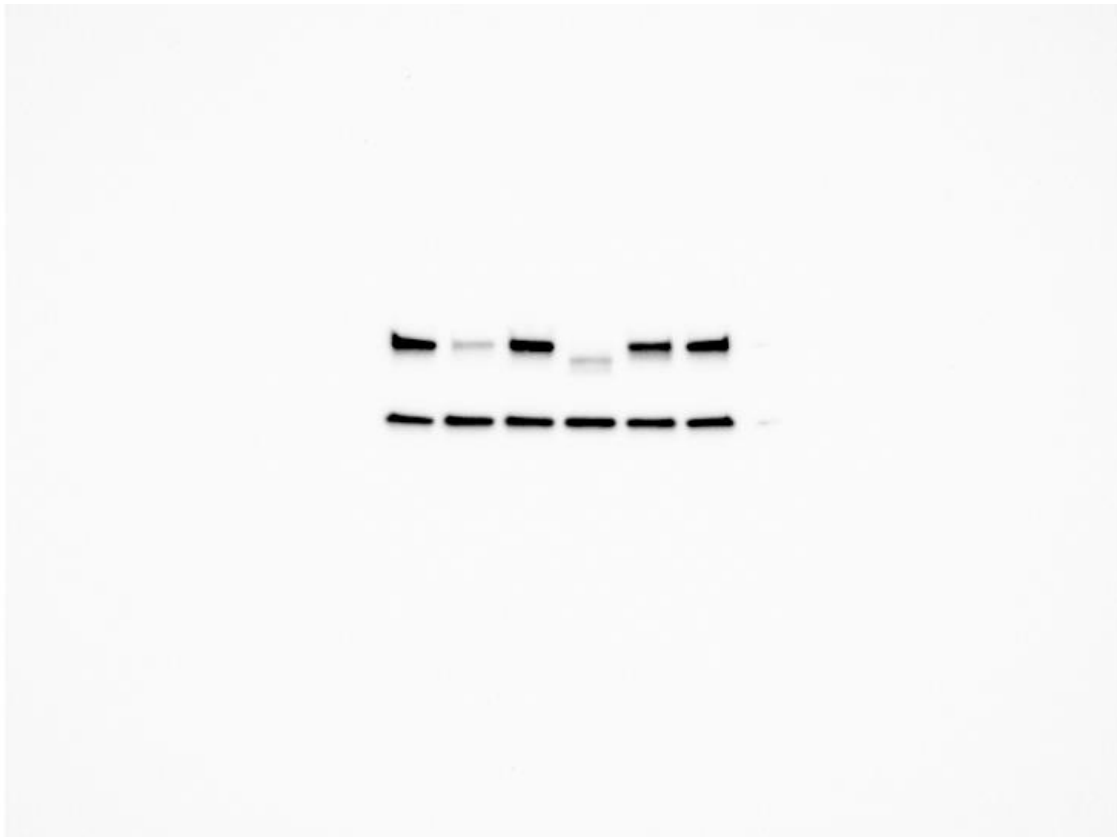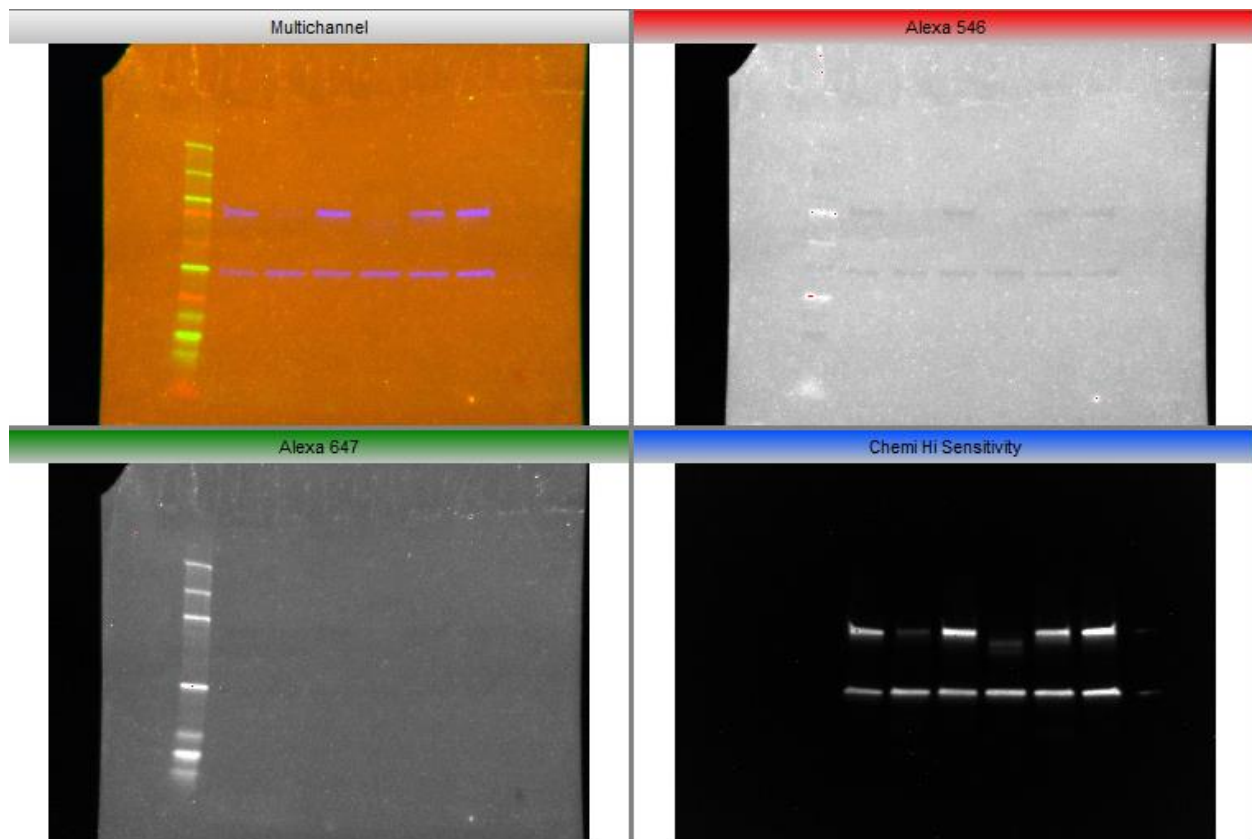

B) Figure 10B

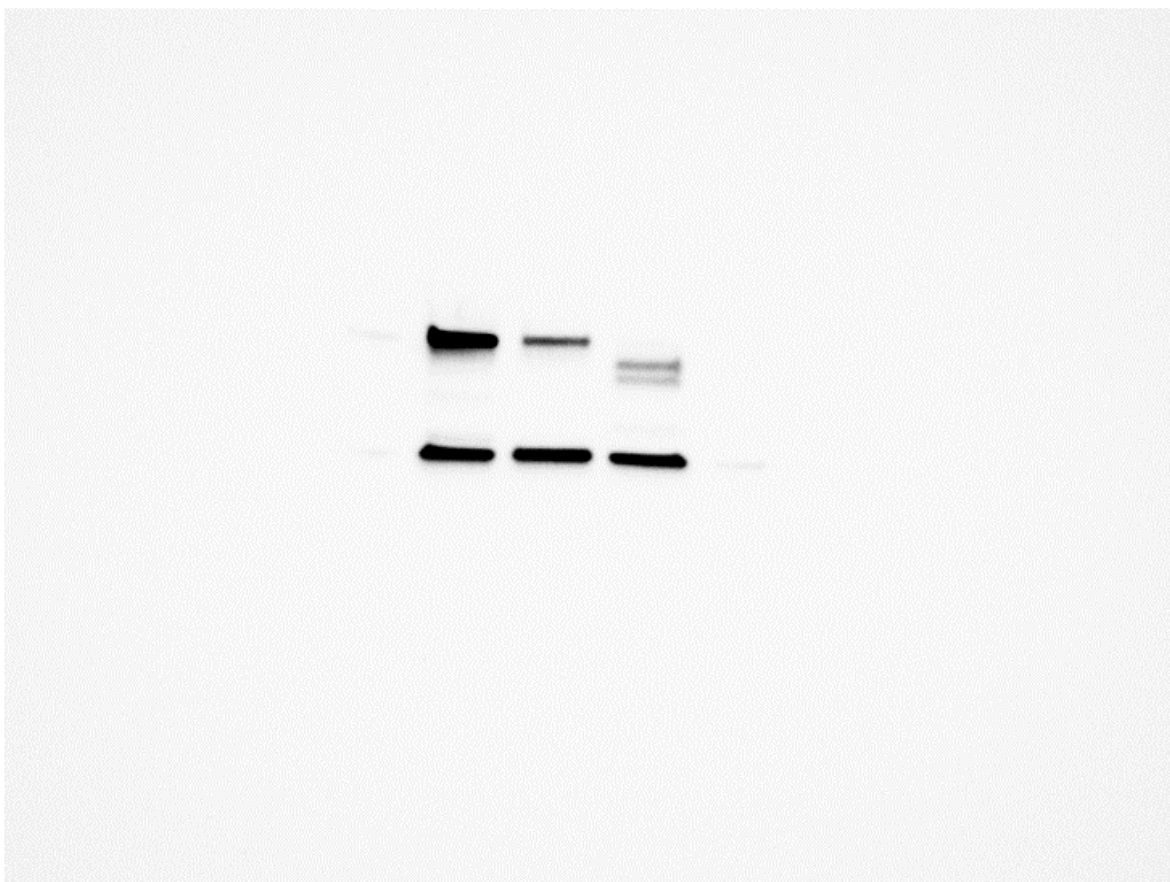

C) Figure 10C
